# Supplementary material
Source: HighWire-hosted journal article supplement (https://www.annfammed.org/highwire/filestream/15256/field_highwire_adjunct_files/0/LeeWhiteboardPhoto.pdf)

Photo of Waiting Room Notification Board

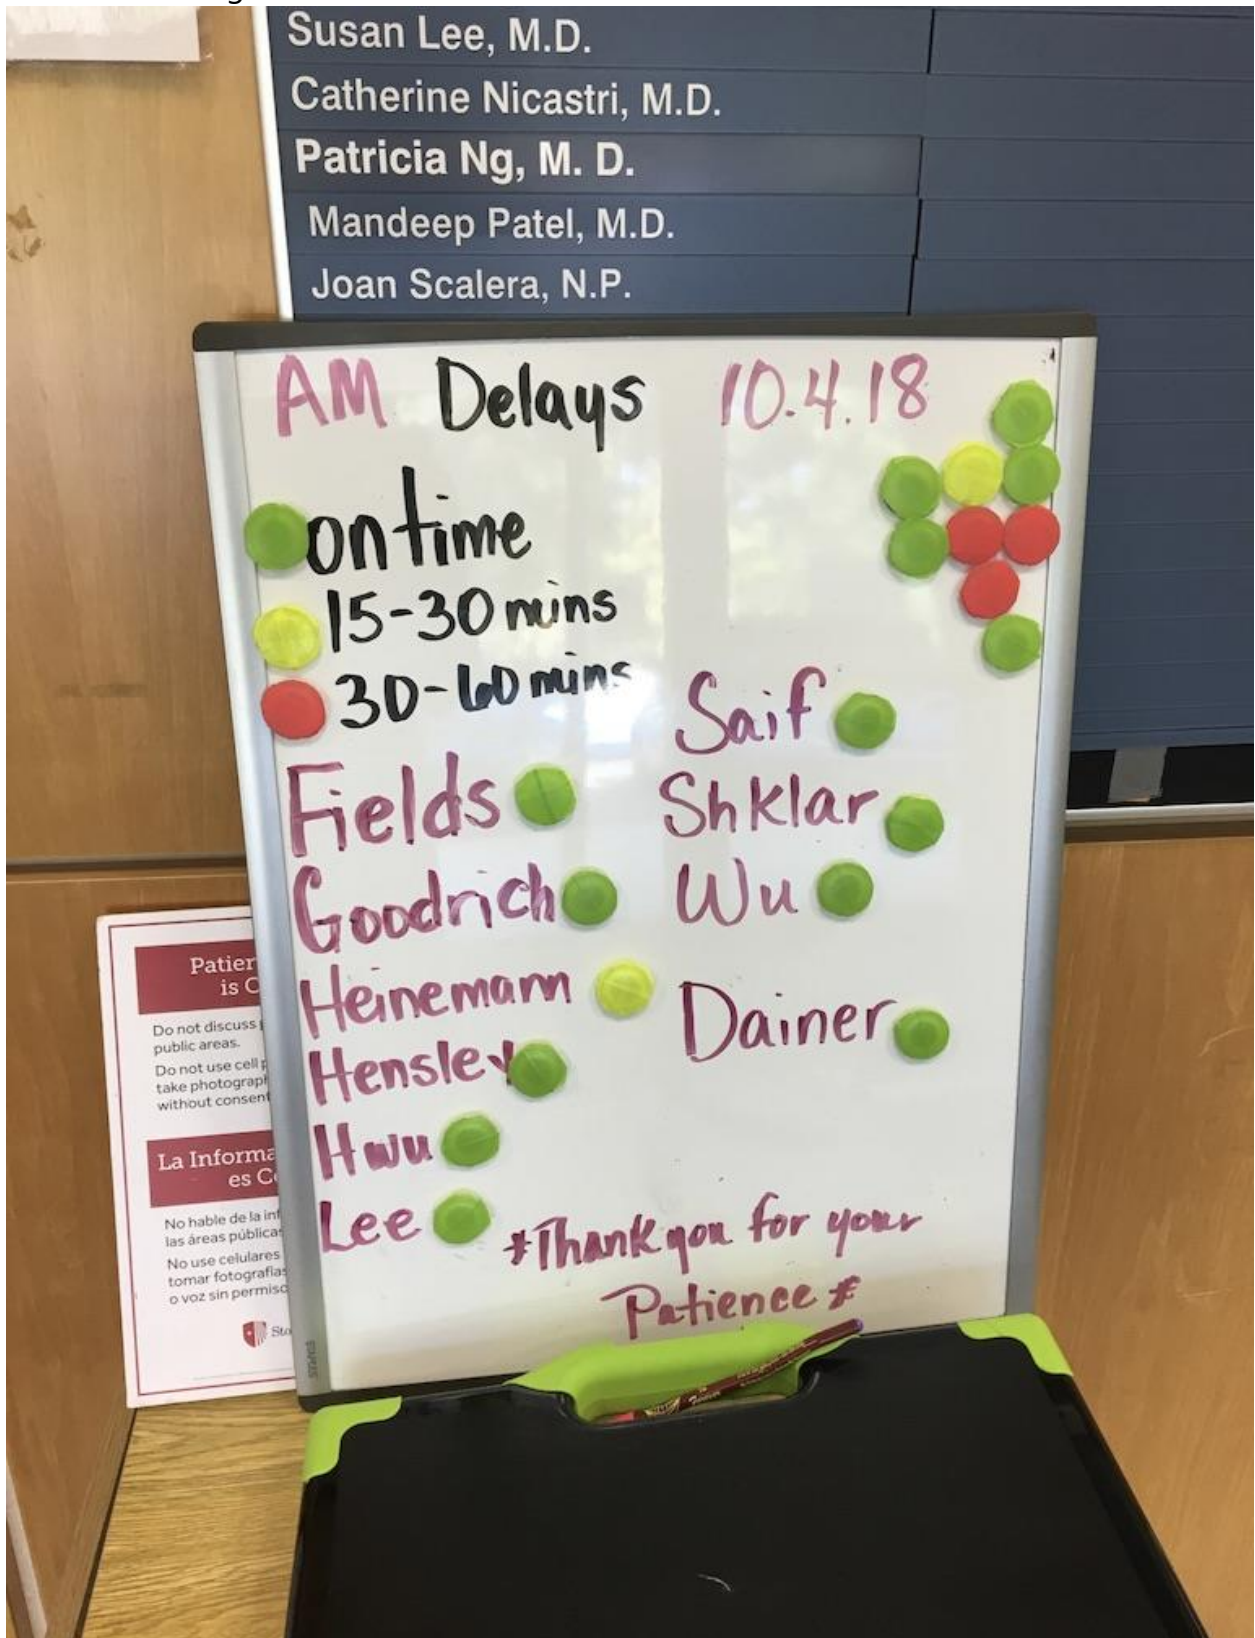

Supplement: LeeWhiteboardPhoto.pdf [file LeeWhiteboardPhoto.pdf]
